# Supplementary figures and images for: Genome-Wide Identification and Expression Analysis of Calmodulin (CaM) and Calmodulin-Like (CML) Genes in the Brown Algae Saccharina japonica
Source: MDPI journal article supplement (doi:10.3390/plants12101934), 2023-05-09

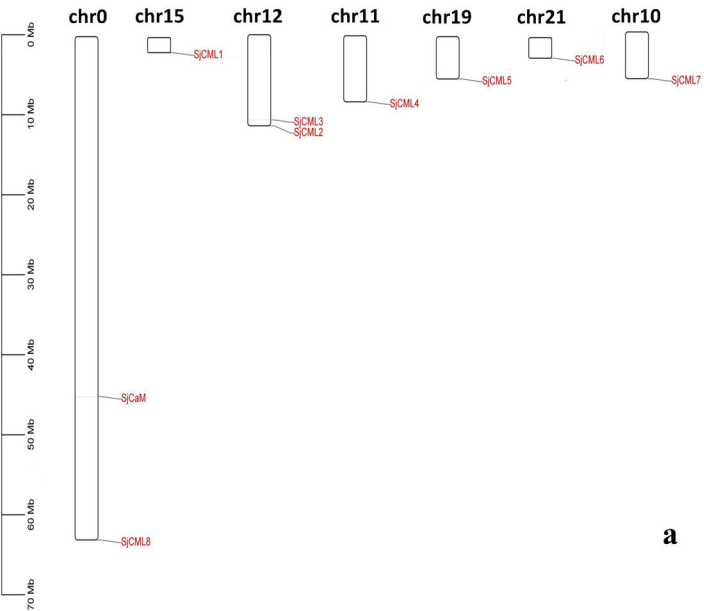

**a**

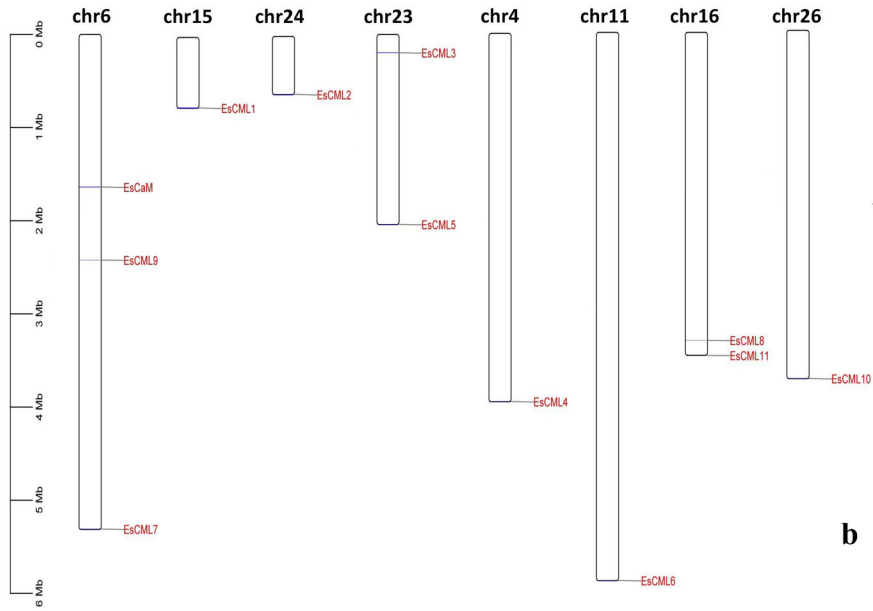

**b**

Supplement: s1 [file s1]

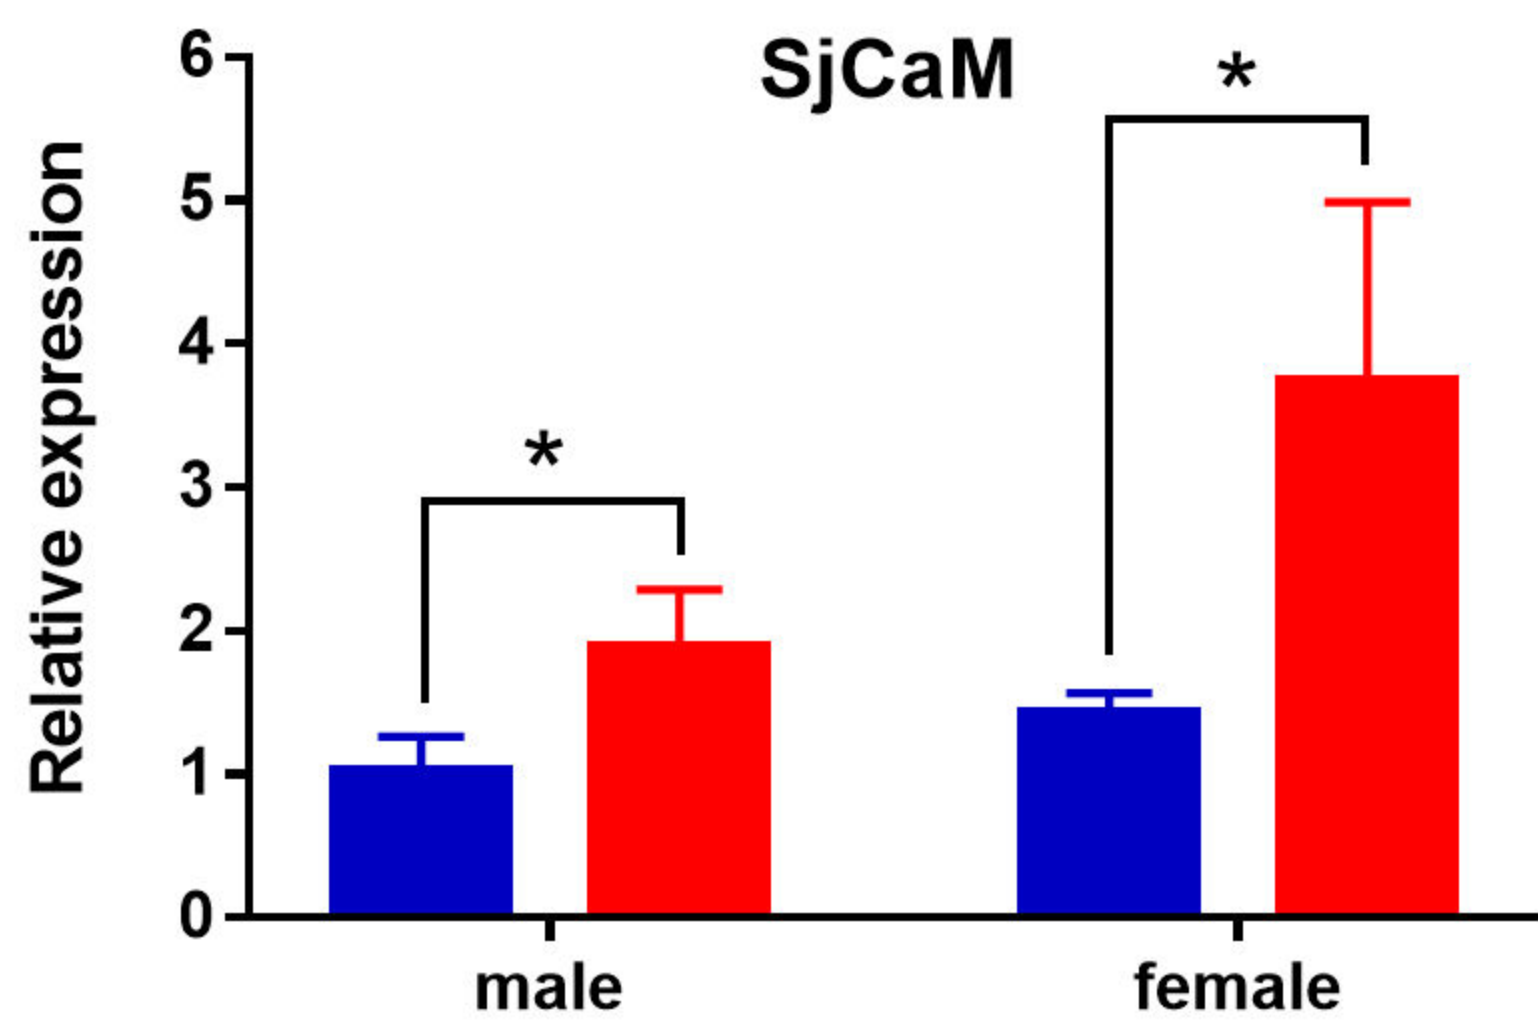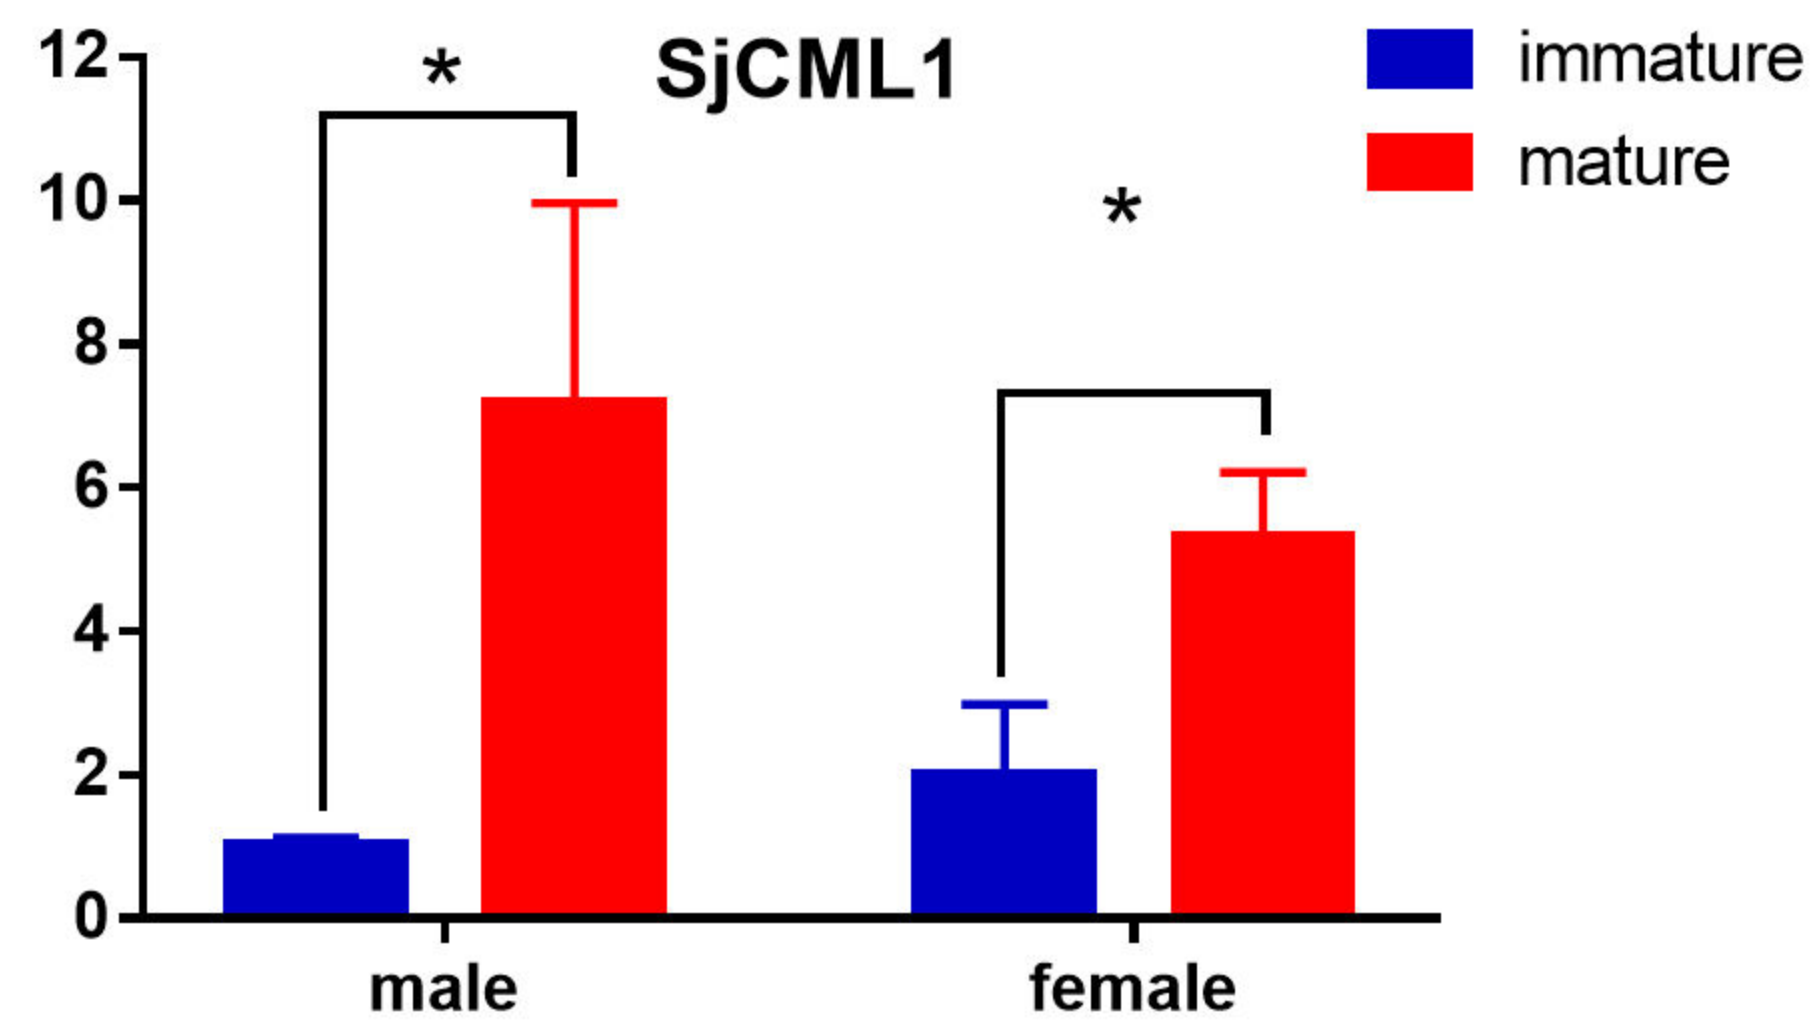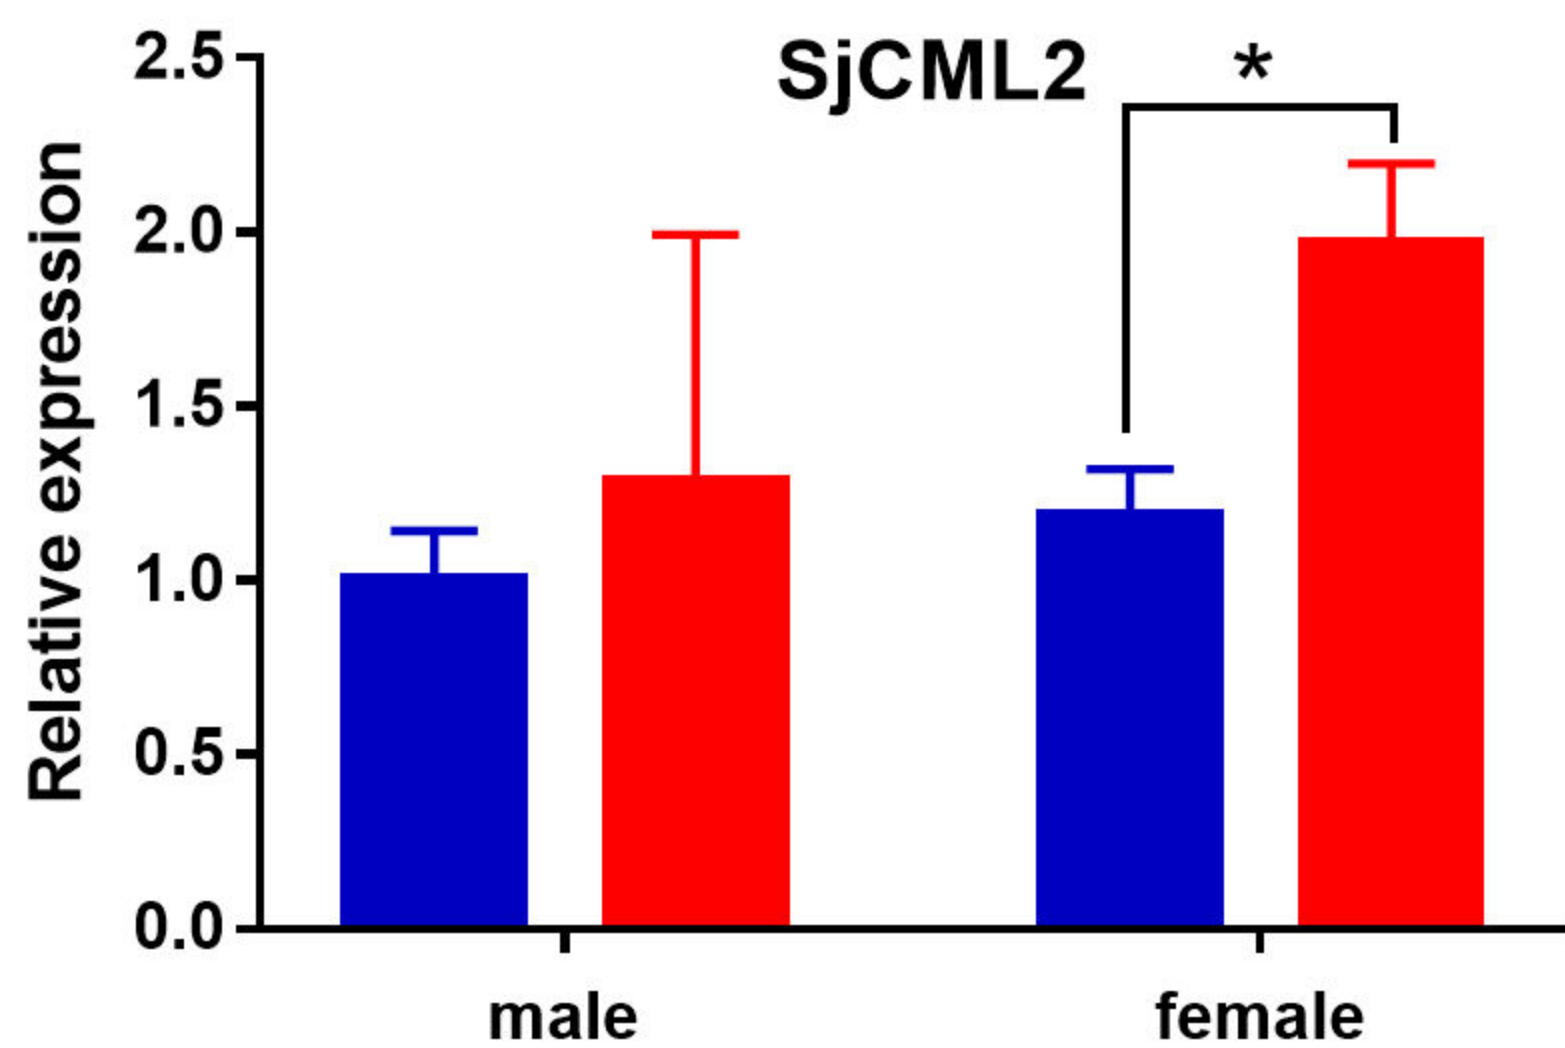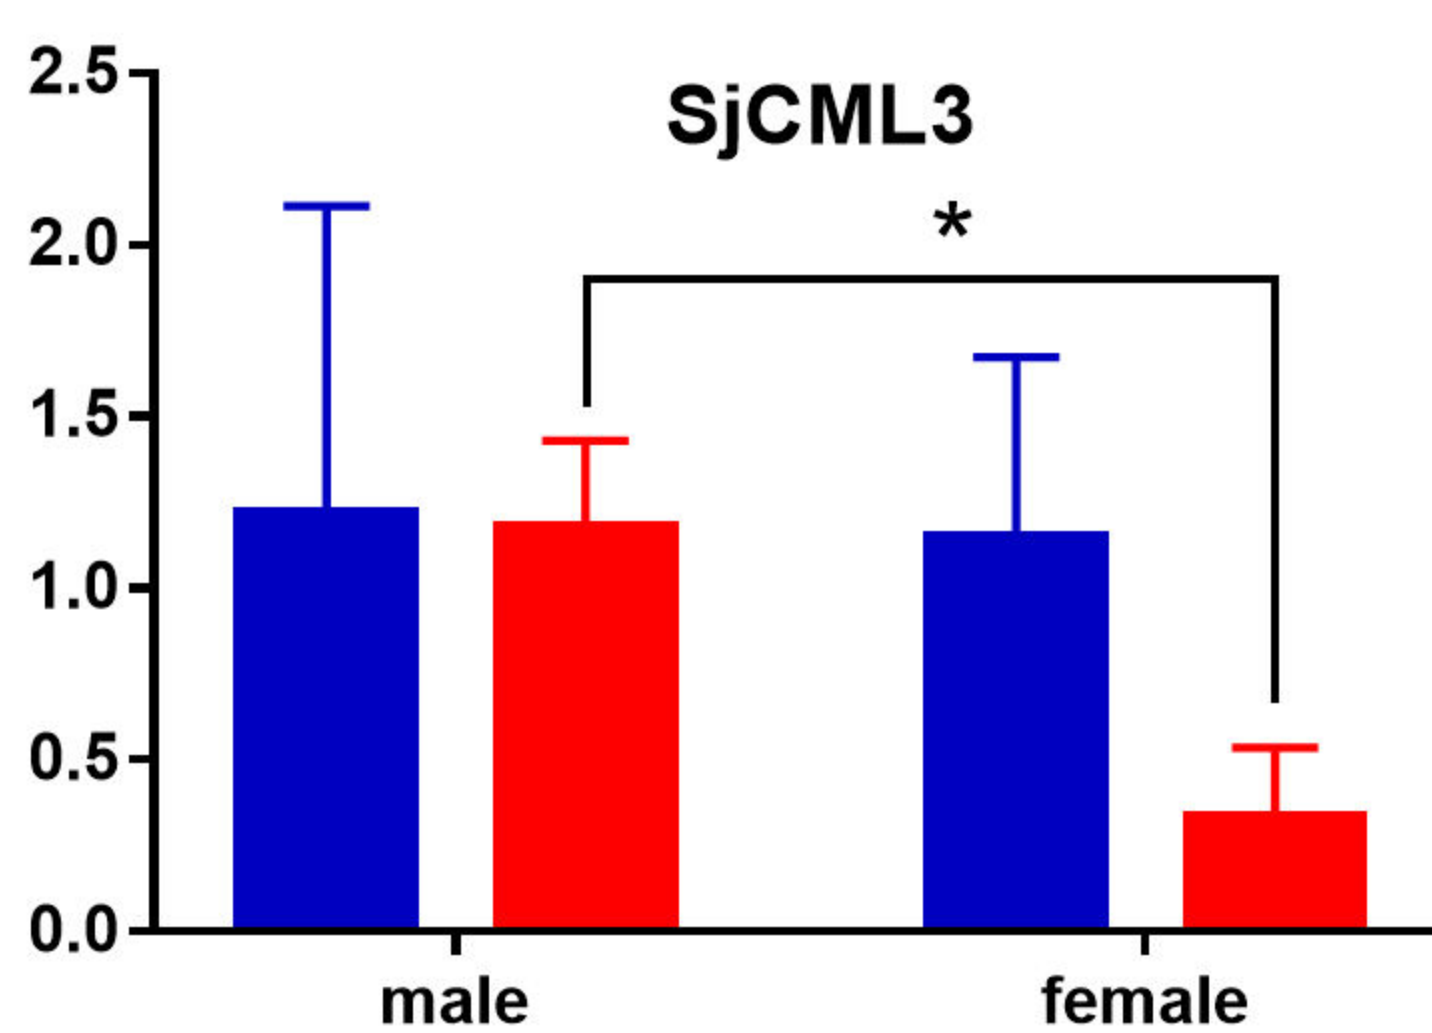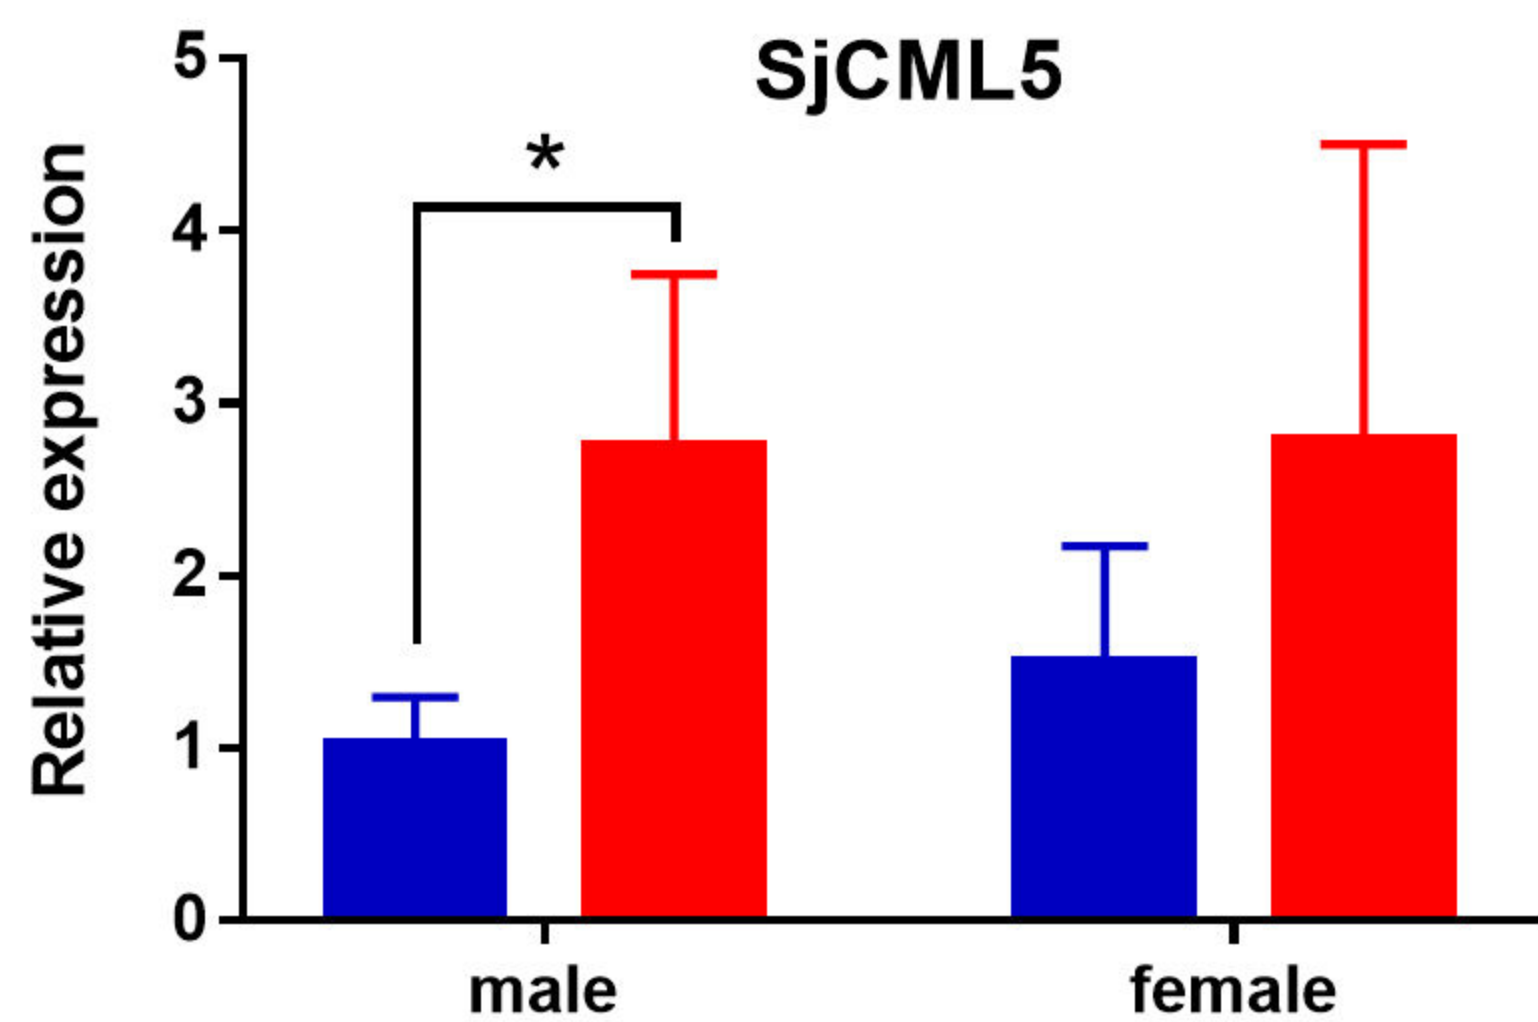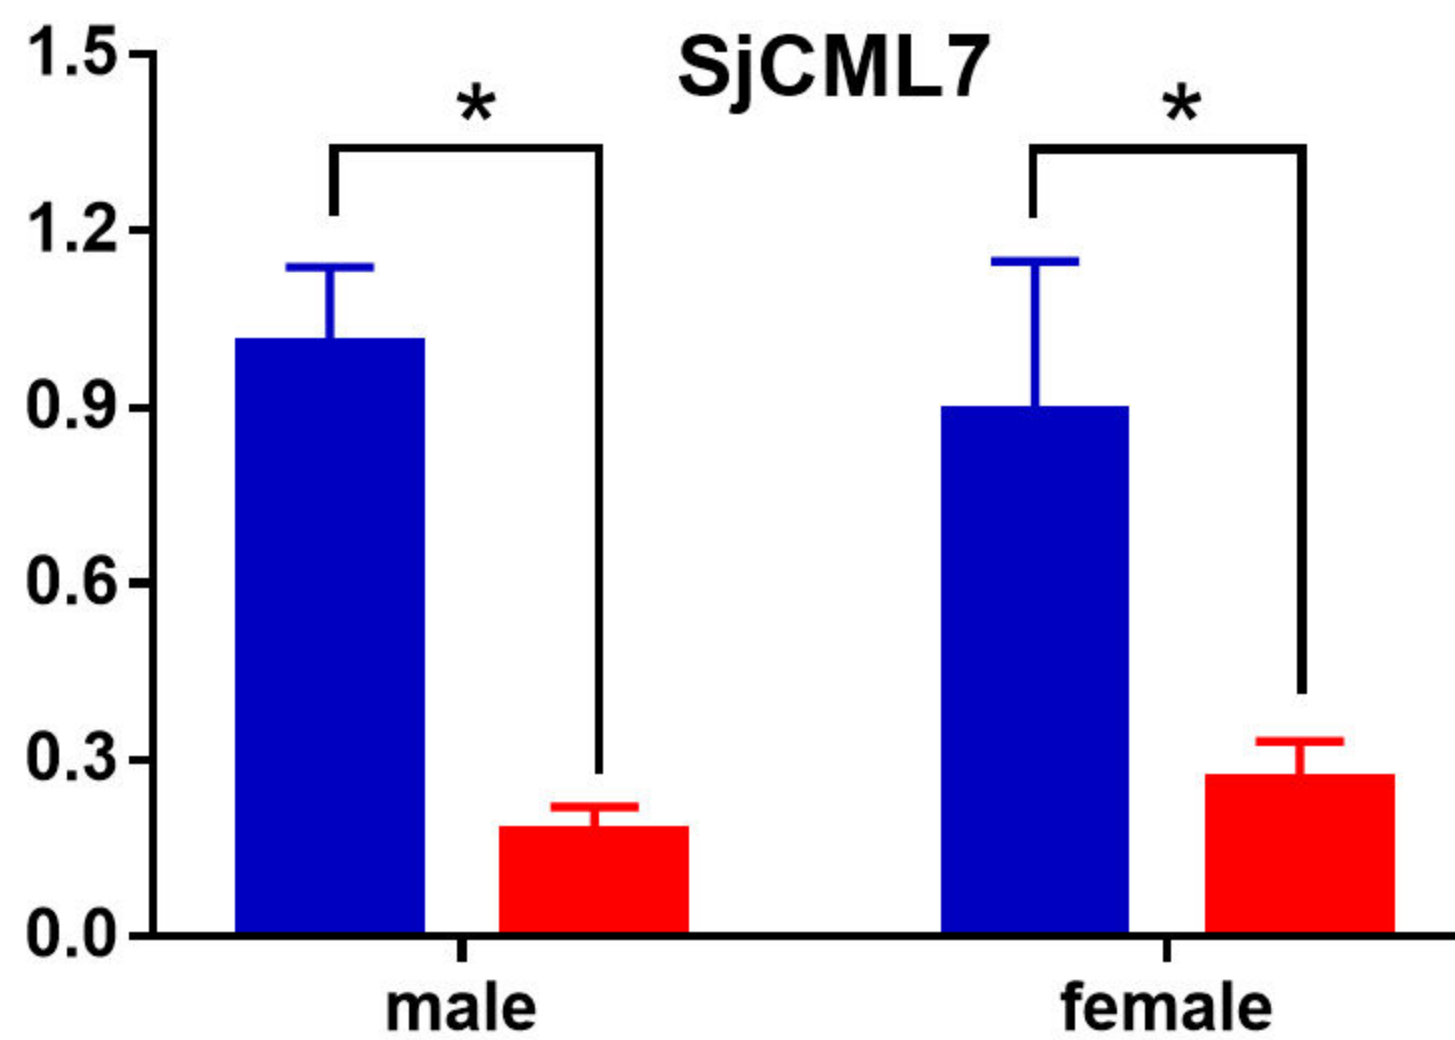

Supplement: s1 [file s1]

# Statistics of Pathway Enrichment

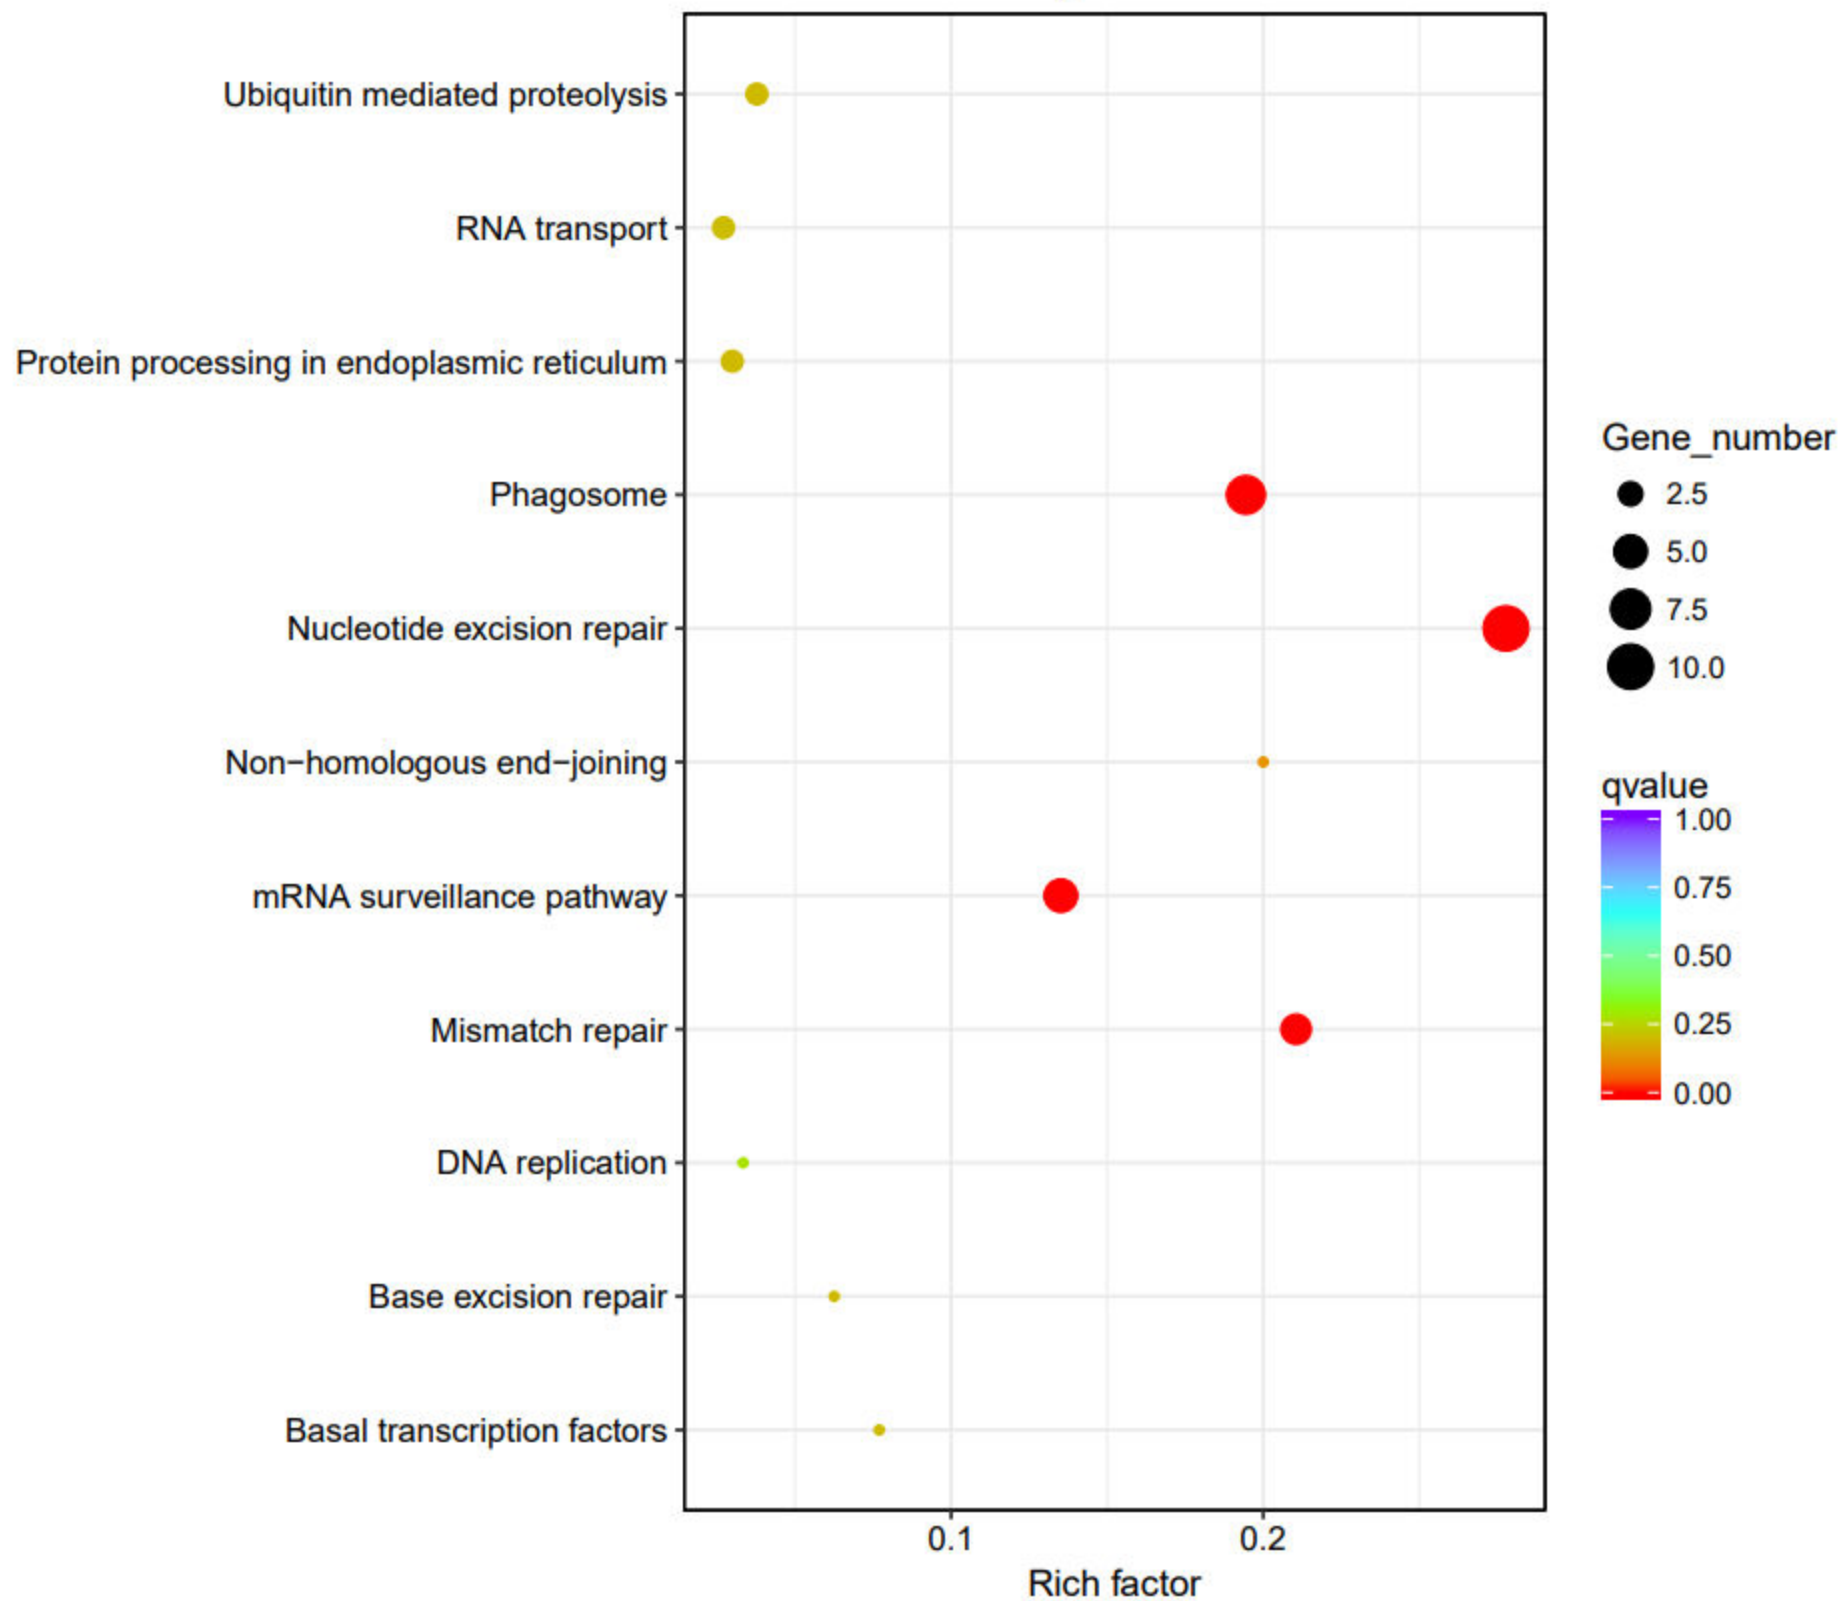

Supplement: s1 [file s1]

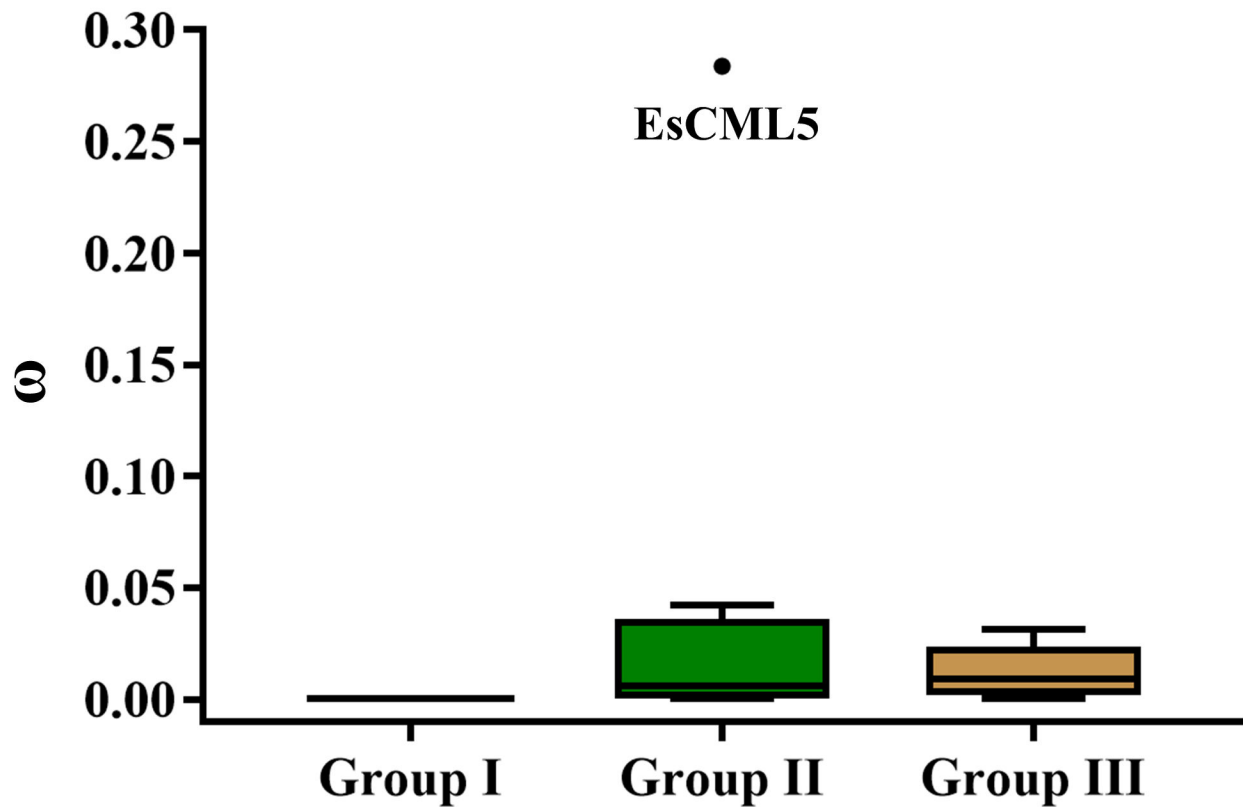

Supplement: s1 [file s1]
